# Supplementary material
Source: PubMed Central journal article supplement (PMC5971474)
Supplement: JB.00135-18_zjb999094780s1.pdf [file JB.00135-18_zjb999094780s1.pdf]

**cAMP and Vfr control Exolysin expression and cytotoxicity  
of *Pseudomonas aeruginosa* taxonomic outliers**

**Alice Berry,<sup>a</sup> Kook Han,<sup>b</sup> Julian Trouillon,<sup>a</sup> Mylène Robert-Genthon,<sup>a</sup> Michel Ragno,<sup>a</sup>  
Stephen Lory,<sup>b</sup> Ina Attrée<sup>a</sup> and Sylvie Elsen<sup>a,#</sup>**

Biology of Cancer and Infection, U1036 INSERM, CEA, University of Grenoble Alpes, ERL5261 CNRS, Grenoble, France<sup>a</sup>; Department of Microbiology and Immunobiology, Harvard Medical School, Boston, Massachusetts, USA<sup>b</sup>

#Address correspondence to Sylvie Elsen, sylvie.elsen@cea.fr.

**Supplemental Material and Methods**

**Mutagenesis of *exlBA* promoter.** Three mutations were introduced into the promoter of *exlBA* directly in the chromosome of the strain IHMA87 *exlA::lacZ*, two abolishing completely the consensus boxes “-10” (“Box -10 mut”) and “-35” (“Box -35 mut”), and the other optimizing the predicted “-35” box to become closer to the consensus one (“Box -35 opt”). To create the mutations, the upstream region and the downstream region flanking the targeted box were amplified using for: 1) “Box -10 mut” : Mut-pexlBA-sF1 / Mut-pexlBA1-new10-sR1 (fragment of 539 pb) and Mut-pexlBA1-new10-sF2 / Mut-pexlBA-sR2 (fragment of 559 pb) ; 2) “Box -35 mut” : Mut-pexlBA-sF1 / Mut-pexlBA1-new35-sR1 (fragment of 515 pb) and Mut-pexlBA1-new35-sF2 / Mut-pexlBA-sR2 (fragment of 583 pb) ; 3) “Box -35 opt” : Mut-pexlBA-sF1 / Mut-pexlBA1-35-sR1 (fragment of 514 pb) and Mut-pexlBA1-35-sF2 / Mut-pexlBA-sR2 (584 pb). The resulting fragments were then cloned into *Sma*I-cut pEXG2 by

Sequence- and Ligation-Independent Cloning (SLIC) (1) and the mutated sequences were introduced into the chromosome by allelic exchange. Each mutation created restriction site (*Sall* or *SphI*) allowing selection of mutated genotype. The primers used for PCR are listed in the Table S1.

1. Li MZ, Elledge SJ. 2007. Harnessing homologous recombination in vitro to generate recombinant DNA via SLIC. *Nat Methods* 4:251-256.

## Supplemental Tables

**TABLE S1.** Primers used in this work

| Name                               | Sequence (5'→3')                                            | Use                                  |
|------------------------------------|-------------------------------------------------------------|--------------------------------------|
| Mut-pexI <sub>BA</sub> -sF1        | GGTCGACTCTAGAGGATCCCCTGGTGATGG<br>CGGCTGGCACC               | <i>pexI<sub>BA</sub></i> mutagenesis |
| Mut-pexI <sub>BA</sub> -sR2        | ACCGAATTCGAGCTCGAGCCCCGACGTAGC<br>CGG CATCGACAT             | <i>pexI<sub>BA</sub></i> mutagenesis |
| Mut-pexI <sub>BA</sub> 1-new10-sR1 | <u>GTCGAC</u> GTCGACAGACCTCACCCGTTTG                        | <i>pexI<sub>BA</sub></i> mutagenesis |
| Mut-pexI <sub>BA</sub> 1-new10-sF2 | GGTGAGGTCTGCGAC <u>GTCGAC</u> ACGCAAGAC<br>ACAAAGTTTACATAAC | <i>pexI<sub>BA</sub></i> mutagenesis |
| Mut-pexI <sub>BA</sub> 1-new35-sR1 | GCATGCCATCCGAGTAAAGAAATTGACCG                               | <i>pexI<sub>BA</sub></i> mutagenesis |
| Mut-pexI <sub>BA</sub> 1-new35-sF2 | TTCTTTACTCGGAT <u>GGCATGC</u> ACGGGTGAG<br>GTCTGCGACTAA     | <i>pexI<sub>BA</sub></i> mutagenesis |
| Mut-pexI <sub>BA</sub> 1-35-sR1    | <u>GTCGAC</u> ATCCGAGTAAAGAAATTGACCG                        | <i>pexI<sub>BA</sub></i> mutagenesis |
| Mut-pexI <sub>BA</sub> 1-35-sF2    | TTTCTTTACTCGGAT <u>GTCGAC</u> AACGGGTGAG<br>GTCTGCGACTAA    | <i>pexI<sub>BA</sub></i> mutagenesis |
| Mut-vfr-F1                         | CTGCAGGCGCCAGCTTAGCACAGGGC                                  | <i>vfr</i> deletion                  |
| Mut-vfr-R1                         | GGCGACCGTCCGGTGACTCAGCGGCCGTC<br>GTCGTCCTCG                 | <i>vfr</i> deletion                  |
| Mut-vfr-F2                         | GTCACCGGACGCGTCGCCC                                         | <i>vfr</i> deletion                  |
| Mut-vfr-R2                         | GGATCCTCTCAACCGGGCCGACGTGG                                  | <i>vfr</i> deletion                  |
| IHMA-Mut-cyaA-F1                   | CCTTAGACCGACGCTGTTCCCTAGTCC                                 | <i>cyaA</i> deletion                 |
| IHMA-Mut-cyaA-R1                   | CTGTGCGTTCATGGGCGTCC                                        | <i>cyaA</i> deletion                 |

|                     |                                                     |                                            |
|---------------------|-----------------------------------------------------|--------------------------------------------|
| IHMA-Mut-cyaA-F2    | GGACGCCCATGAACCGACAGCAGGCGCTGC<br>TGGAGCAATGA       | <i>cyaA</i> deletion                       |
| IHMA-Mut-cyaA-R2    | GGCTCGAGATGCCTTCCTGTGCCTGCTG                        | <i>cyaA</i> deletion                       |
| IHMA-Mut-cyaB-F1    | CCTCTAGAGTGCTCTTCCACGCGCTGGC                        | <i>cyaB</i> deletion                       |
| IHMA-Mut-cyaB-R1    | GAGGGTGGGCTTCATGCGCT                                | <i>cyaB</i> deletion                       |
| IHMA-Mut-cyaB-F2    | AGCGCATGAAGCCCACCCTCTACGTGAGCA<br>CGAACTGCCC        | <i>cyaB</i> deletion                       |
| IHMA-Mut-cyaB-R2    | GGCTCGAGCCTGGTGTGCTCGAAGCC                          | <i>cyaB</i> deletion                       |
| Vfr-binding-F1      | GGATCCTACGGCATGCATCTCGATGTC                         | <i>pex/BA</i> Vfr binding<br>site mutation |
| Vfr-binding-R1      | GCCTCTAGACTGATTCACGAAAGTTGGCG                       | <i>pex/BA</i> Vfr binding<br>site mutation |
| Vfr-binding-F2      | CTTTCGTGAATCAGTCTAGAGGCGTTTCTTC<br>GTCCAGTCAGCAAC   | <i>pex/BA</i> Vfr binding<br>site mutation |
| Vfr-binding-R2      | CTCGAGGCAATTGGCGTTGGCGTTCCT                         | <i>pex/BA</i> Vfr binding<br>site mutation |
| IHMA-Comp-vfr-F     | CCGGATCCCGCCTCGAGGAAGCCTCGCA<br>GC                  | <i>vfr</i><br>complementation              |
| IHMA-Comp-vfr-R     | CCAAGCTTCTGACTGATCCGCGCTGTCGA                       | <i>vfr</i><br>complementation              |
| Comp-cyaA-sF        | GATATCGAATTCCTGCAGCCCGCCGAACAC<br>CTGCTCGAGC        | <i>cyaA</i><br>complementation             |
| Comp-cyaA-sR        | CTTAGAACTAGTGGATCCCCGATAGCCAT<br>GGATTACGTCCCT      | <i>cyaA</i><br>complementation             |
| IHMA-Comp-cyaB-sF   | GATATCGAATTCCTGCAGCCCTTTCGCCGAG<br>TTCTACCCCTAT     | <i>cyaB</i><br>complementation             |
| IHMA-Comp-cyaB-sR   | CTTAGAACTAGTGGATCCCCGAGCAATCC<br>TGGCGGGCCTC        | <i>cyaB</i><br>complementation             |
| SLIC_pEXG2_exlBA'_F | TGCAGGTGCACTCTAGAGGATCCCCAGCGC<br>GGTCTGGAGTCTCG    | <i>exlA-lacZ</i> fusion                    |
| SLIC_exlBA'_lacZ_R  | AAGTTAAAATGCCGCGCCCCTACCTTCTATG<br>CATGAGAACCTCTTCG | <i>exlA-lacZ</i> fusion                    |
| SLIC_lacZ_F         | AGGTAGGGGCGCGGCATTTT                                | <i>exlA-lacZ</i> fusion                    |
| SLIC_lacZ_R         | TTATTTTTGACACCAGACCAACTG                            | <i>exlA-lacZ</i> fusion                    |
| SLIC_lacZ_exlA'_F   | CCAGTTGGTCTGGTGTCAAAAATAAGACAAT<br>CCTGTCTTCCACCTC  | <i>exlA-lacZ</i> fusion                    |
| SLIC_exlA'_pEXG2_R  | AGGTACCGAATTCGAGCTCGAGCCCTCGAG<br>CTCGGTGACGCCT     | <i>exlA-lacZ</i> fusion                    |
| Purif-vfr-NdeI-F    | GGCATATGGTAGCTATTACCCACACACCCA                      | Vfr over-production                        |
| Purif-vfr-BamHI-R   | GGGGATCCTTCAGCGGGTGCCGAAGACCA                       | Vfr over-production                        |
| R_exlB+60           | CAGCAGCAGGGCTCGGCAG                                 | circularization                            |

|                         |                                                                  |                 |
|-------------------------|------------------------------------------------------------------|-----------------|
| F_exIB+4                | CGTACCGCTCTACCGAATCATC                                           | circularization |
| R_exIB+3                | CACGCGGCATCCTTCATGTATC                                           | circularization |
| rpoD-F3                 | CTGTTTCATGCCGATCAAGCTG                                           | RTqPCR          |
|                         |                                                                  | Reference gene  |
| rpoD-R3                 | AACGCTGTCGACCCACTTCTC                                            | RTqPCR          |
|                         |                                                                  | Reference gene  |
| exIB-F                  | CCTATGGCTACTGGACCTACA                                            | RTqPCR          |
| exIB-R                  | AGGTAGCTGTCGACATCCTTG                                            | RTqPCR          |
| exIA-F                  | CGCTGAAGGACAAGCTGGAA                                             | RTqPCR          |
| exIA -R                 | CATTACGGTTCGATGCCGTTT                                            | RTqPCR          |
| 5'Cy5-pex/BA_EMSA_F     | CCAGTCGCGACACGCCAAACTTTCGTGAATC<br>AGTTCACAGGCGTTTCTTCGTCCAGTAG  | EMSA            |
| pex/BA_EMSA_F           | CCAGTCGCGACACGCCAAACTTTCGTGAATC<br>AGTTCACAGGCGTTTCTTCGTCCAGTCAG | EMSA            |
| pex/BA_EMSA-R           | CTGACTGGACGAAGAAACGCCTGTGAACTG<br>ATTCACGAAAGTTTGGCGTGTGCGGACTGG | EMSA            |
| 5'Cy5-pex/BA_mut_EMSA_F | CTGACTGGACGAAGAAACGCCTGTGAACTG<br>ATTCACGAAAGTTTGGCGTGTGCGGACTGG | EMSA            |
| pex/BA_mut_EMSA_F       | CCAGTCGCGACACGCCAAACTTTCGTGAATC<br>AGTCTAGAGGCGTTTCTTCGTCCAGTCAG | EMSA            |
| pex/BA_mut_EMSA-R       | CTGACTGGACGAAGAAACGCCTCTAGACTG<br>ATTCACGAAAGTTTGGCGTGTGCGGACTGG | EMSA            |

**A**

GTCAATTTCTTTACTCGGATGTAACAAACGGGTGAGGTCTGCGACTTAATCTACGCAAG**A**CACAAAGTT  
 -35 -10

consensus : TTGACA N<sub>16/18</sub> TATAAT N<sub>5/8</sub> +1 (A/G)  
*exlBAp* : TAACAA N<sub>18</sub> TAATCT N<sub>7</sub> +1 (A)  
 Box -10 mut : TAACAA N<sub>18</sub> **gtcgac**  
 Box -35 mut : **gcAtgc** N<sub>18</sub> TAATCT  
 Box -35 opt : TcgacA N<sub>18</sub> TAATCT

**B**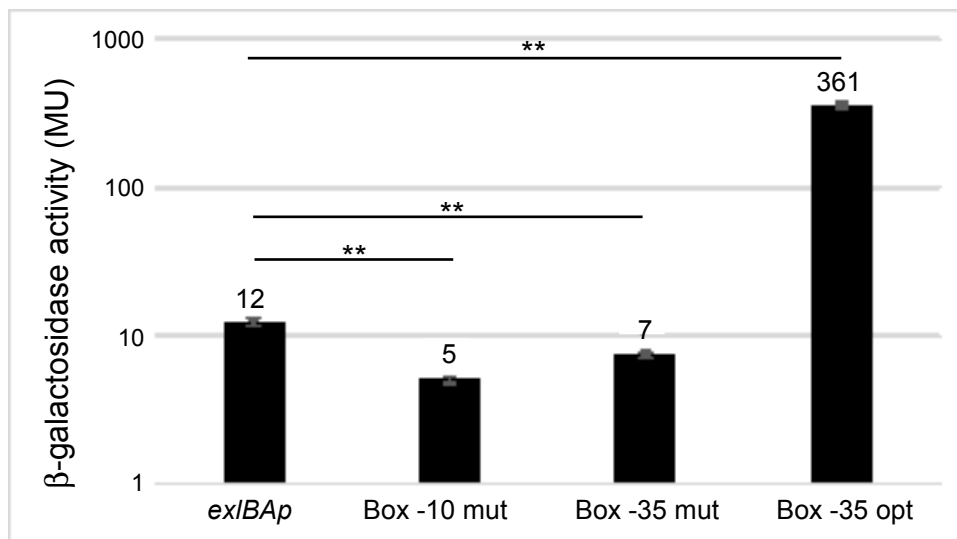

**FIG S1** Definition of the *exlBA* promoter. (A) DNA sequence of the 5' region of *exlB*, with the nucleotide "A" identified as the TSS in bold and pinpointed by an arrow. The putative "-10" and "-35" boxes are underlined and compared to the consensus "-10" and "-35" sequences, with the conserved nucleotides underlined. The mutations introduced in the chromosome of the IHMA87 *exlA::lacZ* strain are indicated with the mutated bases in bold lower cases. The selected changes either reduce (Box -10 mut and Box -35 mut) or increase (Box -35 opt, "opt" for "optimal") the homology to the consensus. (B)  $\beta$ -galactosidase activities of IHMA87 *exlA::lacZ* strain with the indicated *exlBA* sequences. Strains were grown in LB medium at 37°C to an OD<sub>600</sub> of 1.5 then  $\beta$ -galactosidase activity was measured. The experiments were performed in triplicate and the mean values of the  $\beta$ -galactosidase activities are indicated on the top of the histograms (in Miller Units) while the error bars indicate the standard deviations. The p-value ( $p < 0.01$ ) is determined using Mann-Whitney U test and indicated by two stars when the difference with the wild-type *exlBA-lacZ* fusion is statistically supported.

Note that the implication of another putative -35 box (underlined with dashed line, panel (A)) closer to the consensus was ruled out as its modification from GTAACA to GTCGAC ("box -35 opt") led to a higher activity of *exlBAp*. The poor matches of the identified "-10" and "-35" boxes to consensus might explain the low *exlBA* transcriptional activity measured in the IHMA87 strain harboring the native promoter fusion and the mild impact of introduced mutations. On the other hand, the change of the putative "-35" box to fit better the consensus led to strong increase (30 fold) of *exlBAp* activity.

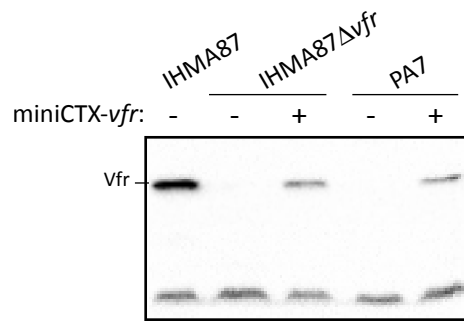

**FIG S2** Vfr synthesis in wild-type and complemented strains. Western blot of the cytosolic fractions of the indicated strains grown in low calcium condition (EGTA/MgCl<sub>2</sub>). The upper band corresponds to Vfr, while the lower band is a non-specific cross-reacting protein used as a loading control. The amount of Vfr observed in the complemented strains is lower compared to the parental strain IHMA87, probably due to the ectopic location (*att* site) of the own-promoter driven *vfr* gene.
